# Supplementary material for: The genomic basis of host and vector specificity in non-pathogenic trypanosomatids
Source: Oxford University Press journal article supplement (doi:10.1242/bio.059237), 2022-04-04
Supplement: bio059237supp.pdf [file bio059237supp.pdf]

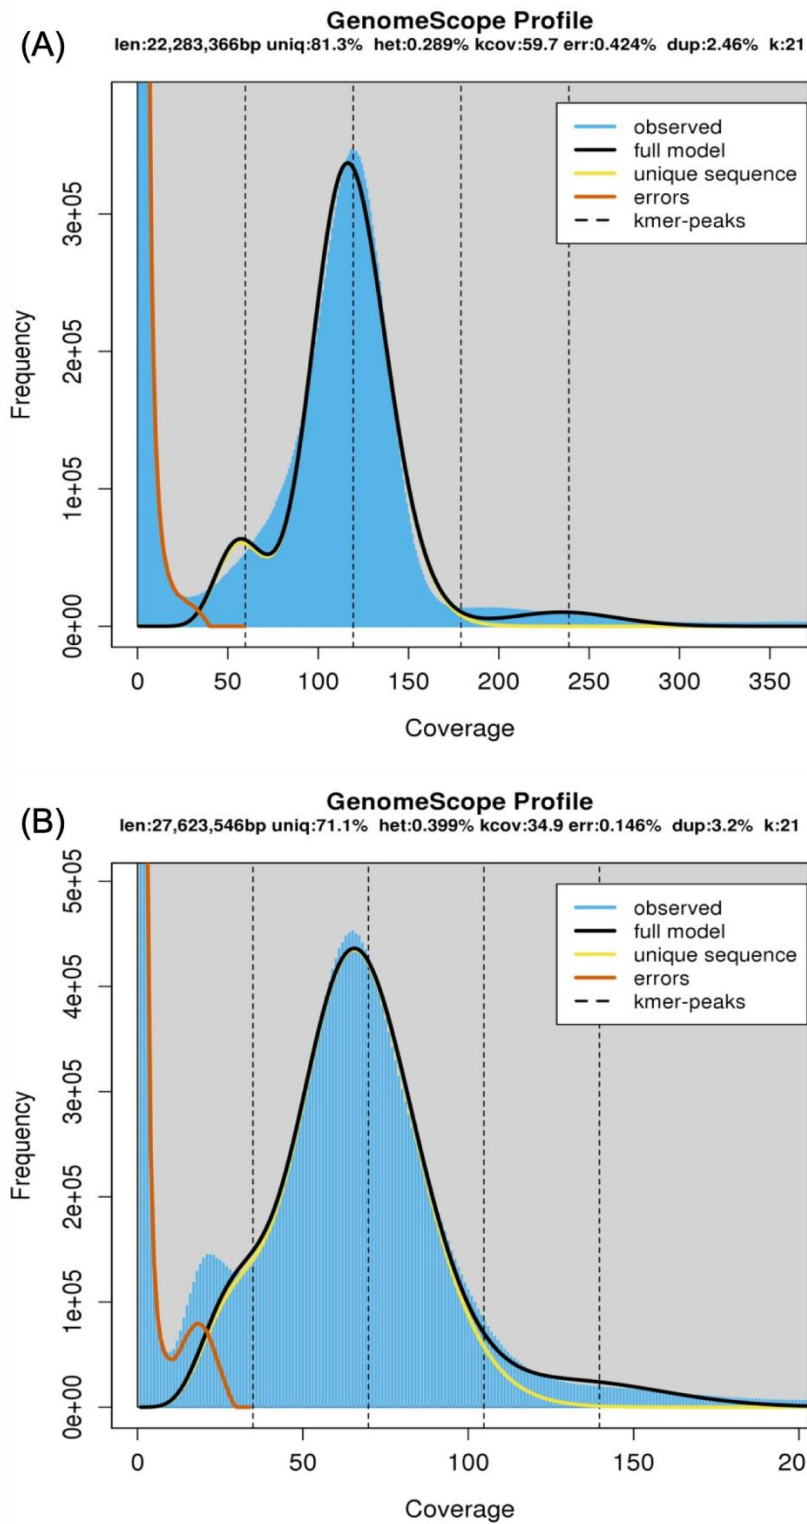

**Fig. S1.** k-mer spectra of (A) *T. melophagium* and (B) *T. theileri* using a k-mer size of 21. The statistics presented in these images represent the lowest estimate size, the highest estimate was used in Table 1 as these had a greater model fit.

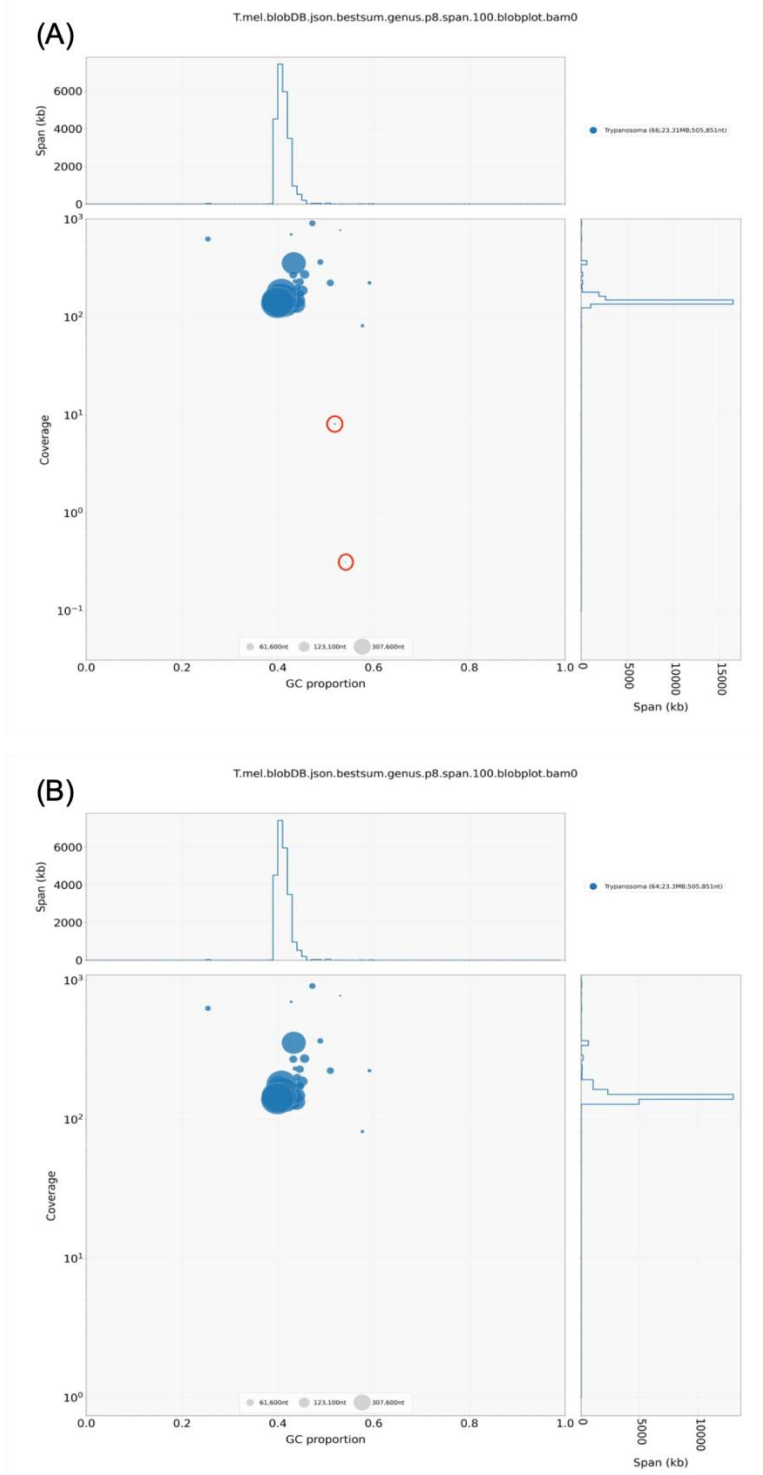

**Fig. S2.** Coverage and blast annotation for (A) the polished assembly and (B) the manually trimmed assembly.

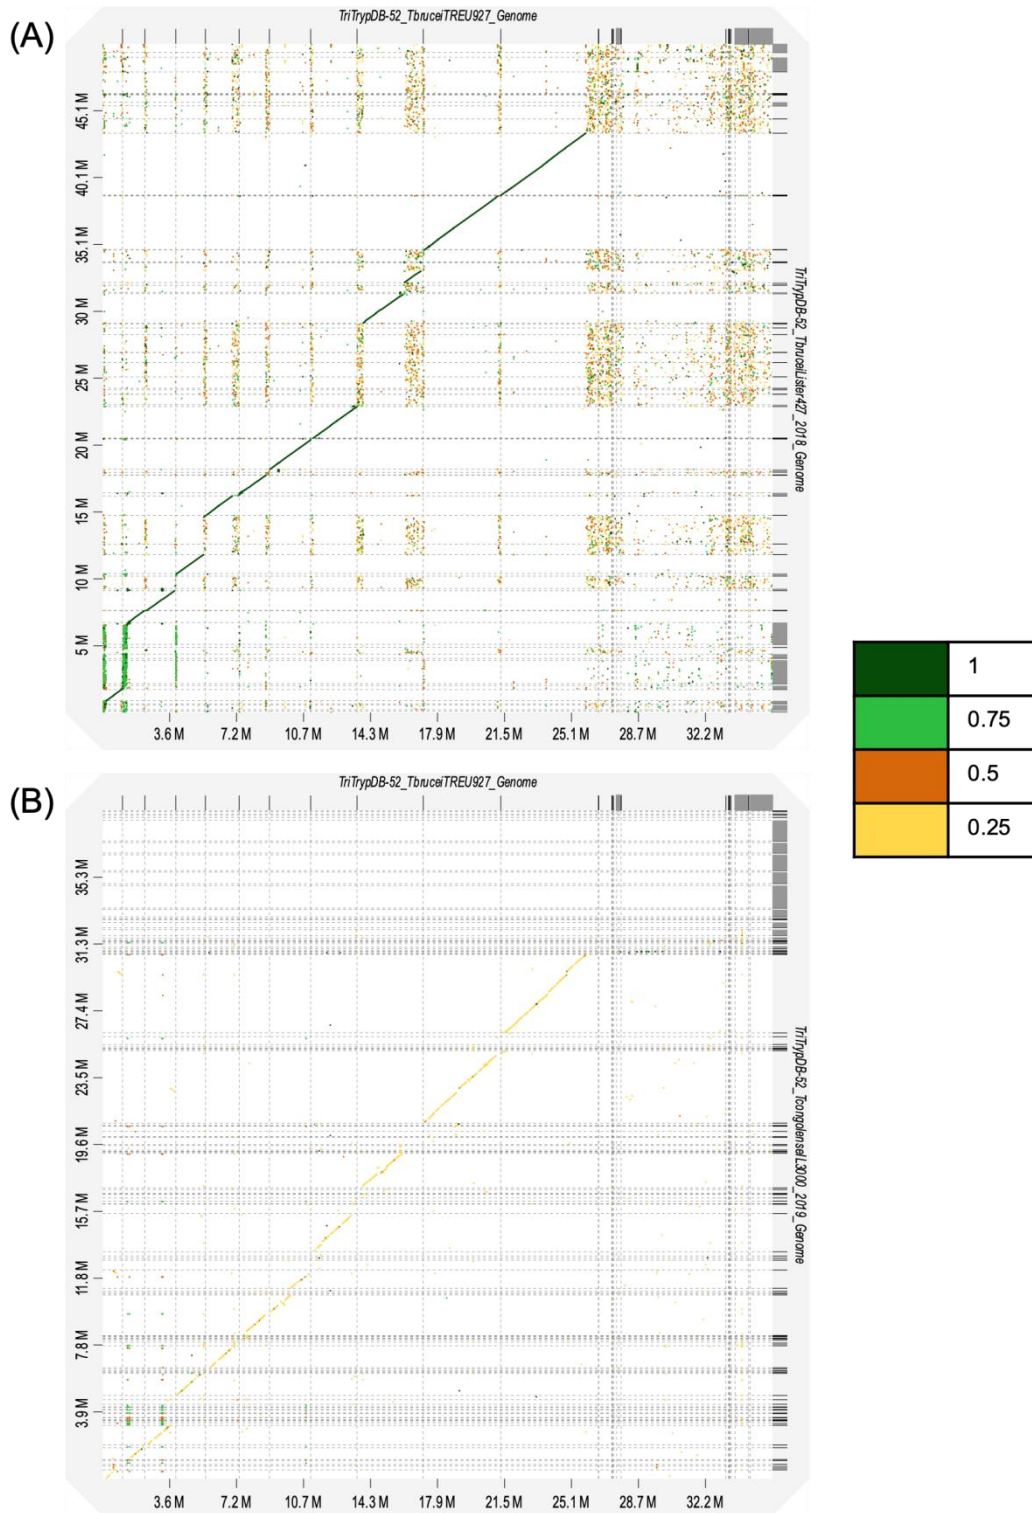

**Fig. S3.** Synteny plot of (A) *T. brucei* TREU927/4 and *T. brucei* Lister 427 (2018) and (B) *T. brucei* TREU927/4 and *T. congolense* IL3000 2019 genome sequences. The legend refers to the identity between the sequences.

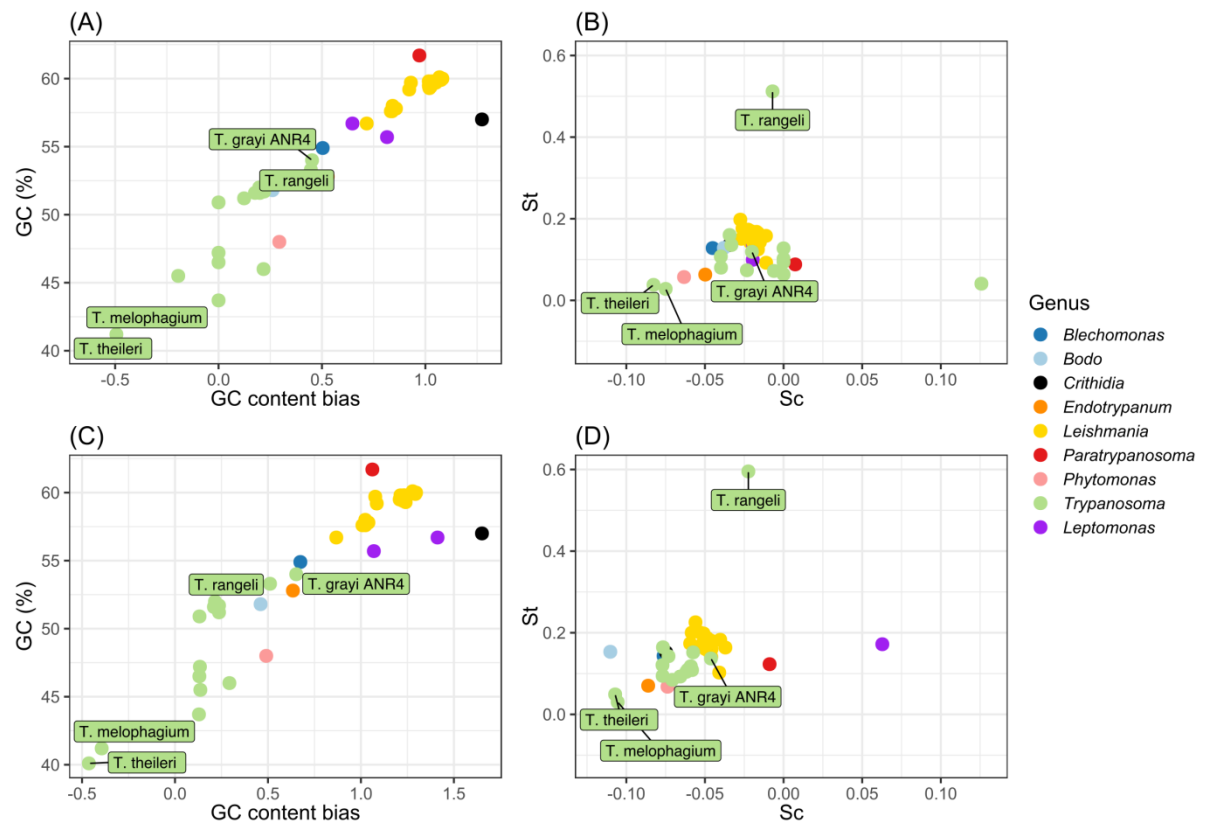

**Fig. S4.** (A) GC content across the whole genome and GC content bias in a every CDS. (B) Selection acting on translational efficiency (St) and selection acting on nucleotide cost (Sc). (C) GC content across the whole genome and GC content bias in CDS of a trypanosomatid universal single copy orthologue which is essential in every life cycle stage in *T. brucei* (n=158). (D) Selection acting on translational efficiency (St) and selection acting on nucleotide cost (Sc) in trypanosomatid universal single copy orthologues which is essential in every life cycle stage in *T. brucei* (n=158).

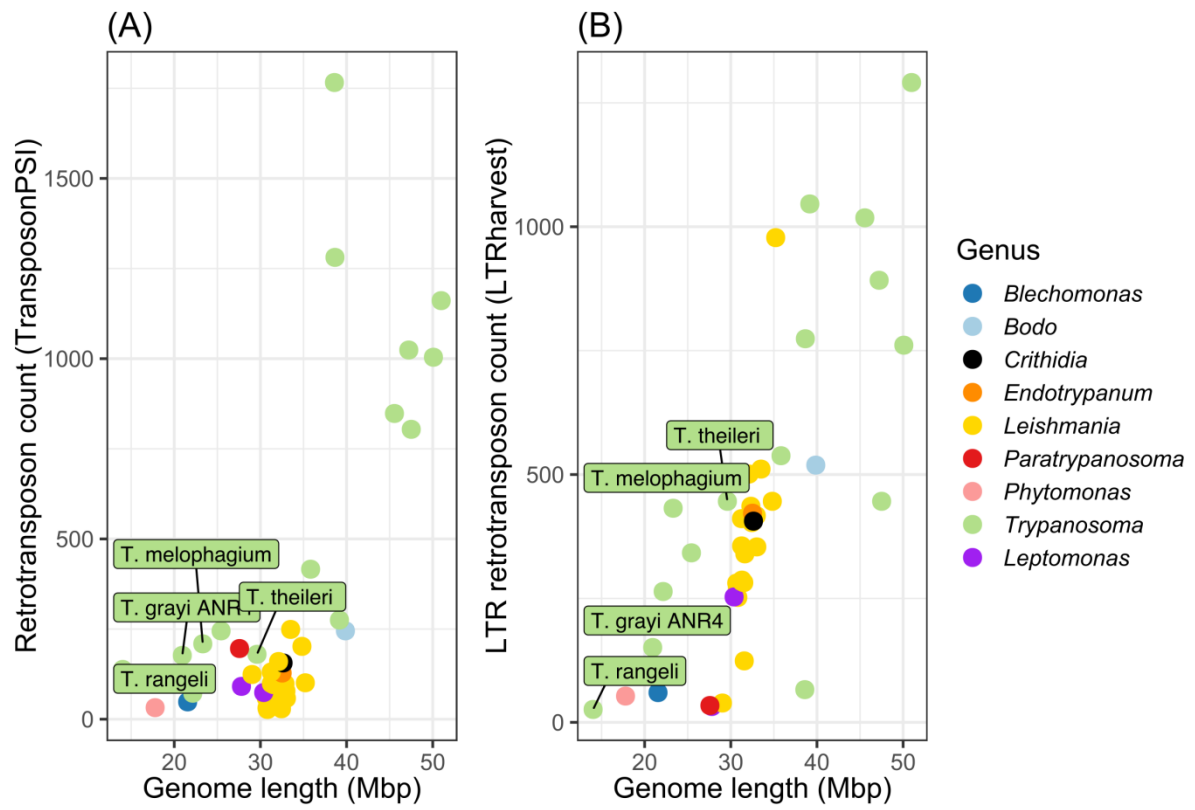

**Fig. S5.** (A) Retrotransposon (B) long terminal repeat (LTR) retrotransposon counts compared to genome length.

**Table S1.** Software and any options used.

| <b>Tool</b>        | <b>Version</b> | <b>Flag</b>                                    | <b>Available at</b>                                                                                                                   |
|--------------------|----------------|------------------------------------------------|---------------------------------------------------------------------------------------------------------------------------------------|
| <b>Guppy</b>       | 4.0.15         | --flowcell FLO-MIN106<br>--kit SQK-RAD004      | <a href="https://community.nanoporetech.com/">https://community.nanoporetech.com/</a>                                                 |
| <b>PycoQC</b>      | 2.5.0.3        |                                                | <a href="https://github.com/arslanslide/pycoQC">https://github.com/arslanslide/pycoQC</a>                                             |
| <b>Trimmomatic</b> | 0.39           | -SLIDINGWINDOW 4:20<br>-MINLEN 50              | <a href="https://github.com/timflutre/trimmomatic">https://github.com/timflutre/trimmomatic</a>                                       |
| <b>GenomeScope</b> | 1              | -Kmer 21<br>-Max kmer cov. 1000                | <a href="http://qb.cshl.edu/genomescope/">http://qb.cshl.edu/genomescope/</a>                                                         |
| <b>Jellyfish</b>   | 2.2.10         | -C -m 21 -s 1000000000                         | <a href="https://github.com/gmarcais/Jellyfish">https://github.com/gmarcais/Jellyfish</a>                                             |
| <b>Wtdbg2</b>      | 3              | -x ont -g 30m -A -t 10                         | <a href="https://github.com/ruanjue/wtdbg2">https://github.com/ruanjue/wtdbg2</a>                                                     |
| <b>Minimap2</b>    | 2.17-r941      | -ax map-ont                                    | <a href="https://github.com/lh3/minimap2">https://github.com/lh3/minimap2</a>                                                         |
| <b>Racon</b>       | v1.4.13        | -m 8 -x -6 -g -8 -w 500                        | <a href="https://github.com/isovic/racon">https://github.com/isovic/racon</a>                                                         |
| <b>Medaka</b>      | V5             | -m r941_min_high_g360                          | <a href="https://github.com/nanoporetech/medaka">https://github.com/nanoporetech/medaka</a>                                           |
| <b>BWA-MEM</b>     | 0.7.17-r1188   |                                                | <a href="https://github.com/lh3/bwa">https://github.com/lh3/bwa</a>                                                                   |
| <b>Pilon</b>       | 1.24           | --genome<br>--diploid --bam<br>--bam           | <a href="https://github.com/broadinstitute/pilon">https://github.com/broadinstitute/pilon</a>                                         |
| <b>Blast</b>       | 2.6.0+         | blastn<br>-task megablast<br>-outfmt '6 qseqid | <a href="ftp://ftp.ncbi.nlm.nih.gov/blast/executables/blast+/LATEST/">ftp://ftp.ncbi.nlm.nih.gov/blast/executables/blast+/LATEST/</a> |

|                          |               |                                                                                       |                                                                                                       |
|--------------------------|---------------|---------------------------------------------------------------------------------------|-------------------------------------------------------------------------------------------------------|
|                          |               | staxids bitscore std'<br>-max_target_seqs 1<br>-max_hsps 1<br>-evaluate 1e-25 or 1e-5 |                                                                                                       |
| <b>DIAMOND</b>           | 2.0.5.14<br>3 | Blastx<br>--sensitive<br>--max-target-seqs 1<br>--evaluate 1e-25                      | <a href="http://www.diamondsearch.org">http://www.diamondsearch.org</a>                               |
| <b>BlobTools</b>         | 1.1.1         | -r genus                                                                              | <a href="https://github.com/DRL/blobtools">https://github.com/DRL/blobtools</a>                       |
| <b>Scaffold_stats.pl</b> | N/A           |                                                                                       | <a href="https://github.com/sujaikumar/assemblage">https://github.com/sujaikumar/assemblage</a>       |
| <b>BUSCO</b>             | V5            | -l euglenozoa_odb10                                                                   | <a href="https://busco.ezlab.org/">https://busco.ezlab.org/</a>                                       |
| <b>RepeatModeler</b>     | N/A           | -database -<br>LTRStruct -pa 8                                                        | <a href="http://www.repeatmasker.org/RepeatModeler/">http://www.repeatmasker.org/RepeatModeler/</a>   |
| <b>RepeatMasker</b>      | N/A           | -lib<br>consensi.fa.classified<br>-pa 8 -xsmall -nolow<br>-gff                        | <a href="http://www.repeatmasker.org/RMDownload.html">http://www.repeatmasker.org/RMDownload.html</a> |
| <b>BRAKER2</b>           | 2.1.6         | --prot_seq<br>--bam<br>--softmasking<br>--etpmode<br>--gff3                           | <a href="https://github.com/Gaius-Augustus/BRAKER">https://github.com/Gaius-Augustus/BRAKER</a>       |
| <b>D-Genies</b>          | 1.2.0         | -Minimap2                                                                             | <a href="http://dgenies.toulouse.inra.fr/run">http://dgenies.toulouse.inra.fr/run</a>                 |
| <b>tRNAscan-SE</b>       | 2.0.9         | -E                                                                                    | <a href="http://lowelab.ucsc.edu/tRNAscan-SE/">http://lowelab.ucsc.edu/tRNAscan-SE/</a>               |
| <b>CodonMuse</b>         | 0.1.0         | -f<br>-tscan                                                                          | <a href="https://github.com/easeward/CodonMuSe">https://github.com/easeward/CodonMuSe</a>             |

|                        |           |                                                            |                                                                                                                                     |
|------------------------|-----------|------------------------------------------------------------|-------------------------------------------------------------------------------------------------------------------------------------|
| <b>TransposonPSI</b>   | 1.0.0     | -nuc                                                       | <a href="http://transposonpsi.sourceforge.net">http://transposonpsi.sourceforge.net</a>                                             |
| <b>gt suffixerator</b> | 1.6.2     | -tis -suf -lcp -des -ssp -sds -dna                         | <a href="http://genometools.org/tools/gt_ltrharvest.html">http://genometools.org/tools/gt_ltrharvest.html</a>                       |
| <b>gt LTRharvest</b>   | 1.6.2     |                                                            | <a href="http://genometools.org/tools/gt_ltrharvest.html">http://genometools.org/tools/gt_ltrharvest.html</a>                       |
| <b>OrthoFinder</b>     | 2.5.2     | -S<br>diamond_ultra_sens                                   | <a href="https://github.com/davidemms/OrthoFinder">https://github.com/davidemms/OrthoFinder</a>                                     |
| <b>InterProScan</b>    | 5.52-86.0 | --dp<br>--goterms<br>-appl SignalP-EUK-4.1, Pfam<br>-f TSV | <a href="https://www.ebi.ac.uk/interpro/">https://www.ebi.ac.uk/interpro/</a>                                                       |
| <b>KinFin</b>          | 1.0.3     |                                                            | <a href="https://github.com/DRL/kinfin">https://github.com/DRL/kinfin</a>                                                           |
| <b>iTOL</b>            | 6         |                                                            | <a href="https://itol.embl.de">https://itol.embl.de</a>                                                                             |
| <b>R</b>               | 3.6.1     |                                                            | <a href="https://www.r-project.org/">https://www.r-project.org/</a>                                                                 |
| <b>ggplot2</b>         | 3.3.3     |                                                            | <a href="https://cran.r-project.org/web/packages/ggplot2/index.html">https://cran.r-project.org/web/packages/ggplot2/index.html</a> |
| <b>ggrepel</b>         | 0.9.1     |                                                            | <a href="https://cran.r-project.org/web/packages/ggrepel/index.html">https://cran.r-project.org/web/packages/ggrepel/index.html</a> |



**Table S2.**

[Click here to download Table S2](#)

**Table S3.**

[Click here to download Table S3](#)

**Table S4.**

[Click here to download Table S4](#)

**Table S5.**

[Click here to download Table S5](#)
